# Supplementary material
Source: Research Square preprint supplement (doi:10.21203/rs.3.rs-9091888/v1)
Supplement: Supplementary file 1 [file cc4e8587f5aa5c15694c210e.docx]

**Table Ⅱ**

Top 15 Keywords with the Strongest Bursts

| **Keywords** | **Year** | **Strength** | **Begin** | **End** | **2015 - 2025** |
| --- | --- | --- | --- | --- | --- |
| age | 2015 | 1.73 | 2015 | 2023 | ▃▃▃▃▃▃▃▃▃▂▂ |
| article | 2016 | 3.95 | 2016 | 2020 | ▂▃▃▃▃▃▂▂▂▂▂ |
| innovation management | 2018 | 1.98 | 2018 | 2019 | ▂▂▂▃▃▂▂▂▂▂▂ |
| human | 2019 | 3.01 | 2019 | 2020 | ▂▂▂▂▃▃▂▂▂▂▂ |
| leadership | 2019 | 2.74 | 2019 | 2020 | ▂▂▂▂▃▃▂▂▂▂▂ |
| higher education | 2019 | 2.2 | 2019 | 2021 | ▂▂▂▂▃▃▃▂▂▂▂ |
| dynamic capabilities | 2019 | 2.11 | 2019 | 2023 | ▂▂▂▂▃▃▃▃▃▂▂ |
| transformational leadership | 2020 | 2.15 | 2020 | 2022 | ▂▂▂▂▂▃▃▃▂▂▂ |
| digital strategy | 2020 | 2.11 | 2020 | 2023 | ▂▂▂▂▂▃▃▃▃▂▂ |
| adult | 2020 | 1.93 | 2020 | 2022 | ▂▂▂▂▂▃▃▃▂▂▂ |
| digital space | 2020 | 1.76 | 2020 | 2021 | ▂▂▂▂▂▃▃▂▂▂▂ |
| behavioural data analysis | 2020 | 1.76 | 2020 | 2021 | ▂▂▂▂▂▃▃▂▂▂▂ |
| business | 2021 | 2.04 | 2021 | 2023 | ▂▂▂▂▂▂▃▃▃▂▂ |
| trust | 2022 | 2.3 | 2022 | 2023 | ▂▂▂▂▂▂▂▃▃▂▂ |
| information technology | 2023 | 1.93 | 2023 | 2025 | ▂▂▂▂▂▂▂▂▃▃▃ |
